# Supplementary material
Source: publisher figshare collection journal article supplement (https://acs.figshare.com/ndownloader/files/9981859)
Supplement: Supplementary file 1 [file 9981859]

## Supporting Information

### Controllable Synthesis of Two-Dimensional Ruddlesden-Popper Type Perovskite

#### Heterostructures

Jun Wang<sup>1#</sup>, Junze Li<sup>1#</sup>, Qinghai Tan<sup>2,3</sup>, Lei Li<sup>1</sup>, Jianbing Zhang<sup>1</sup>, Jianfeng Zang<sup>1,4</sup>,

Pingheng Tan<sup>2,3</sup>, Jun Zhang<sup>2,3\*</sup> and Dehui Li<sup>1,5\*</sup>

<sup>1</sup>*School of Optical and Electronic Information, Huazhong University of Science and Technology, Wuhan, 430074, China;*

<sup>2</sup>*State Key Laboratory of Superlattices and Microstructures, Institute of Semiconductors, Chinese Academy of Sciences, Beijing 100083, China*

<sup>3</sup>*College of Materials Science and Opto-Electronic Technology, University of Chinese Academy of Sciences, Beijing 101408, China*

<sup>4</sup>*Innovation Institute, Huazhong University of Science and Technology, Wuhan, 430074, China;*

<sup>5</sup>*Wuhan National Laboratory for Optoelectronics, Huazhong University of Science and Technology, Wuhan, 430074, China;*

<sup>#</sup> Those authors contribute to this work equally.

\*Correspondence to: Email: [zhangjwill@semi.ac.cn](mailto:zhangjwill@semi.ac.cn); [dehuili@hust.edu.cn](mailto:dehuili@hust.edu.cn).

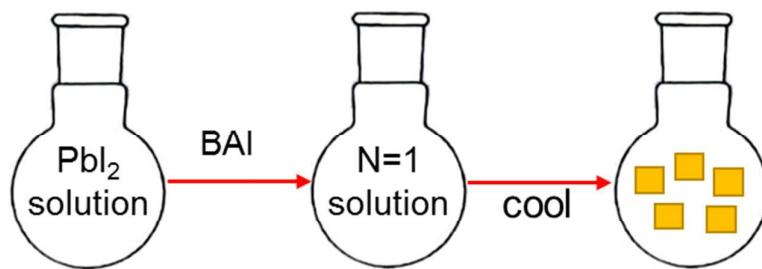

**Figure S1.** Schematic illustration of the solution process for obtaining centimeter-size N=1 2D perovskite. This procedure has been successfully used to synthesis relatively pure  $(\text{BA})_2\text{MA}_{N-1}\text{Pb}_N\text{I}_{3N+1}$  ( $N=1-5$ )<sup>1, 2</sup>. To obtain centimeter-size plates, the reaction temperature is 140 °C which is higher than the boiling point, and the saturation solution were kept static overnight.

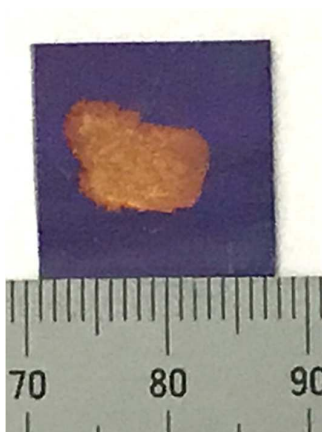

**Figure S2.** Backside view of vertical heterostructure shown in Fig. 1f in the maintext. The yellow color represents the color of N=1 2D perovskite, confirming the formation of the vertical heterostructure.

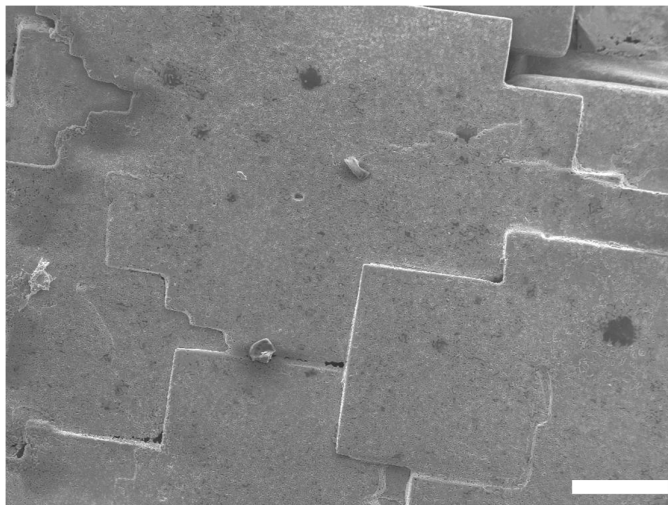

**Figure S3.** SEM image of N=1 plate obtained by solution process. The scale bar is 100  $\mu\text{m}$ . The surface of N=1 plate before gas-solid phase intercalation process is relatively smooth.

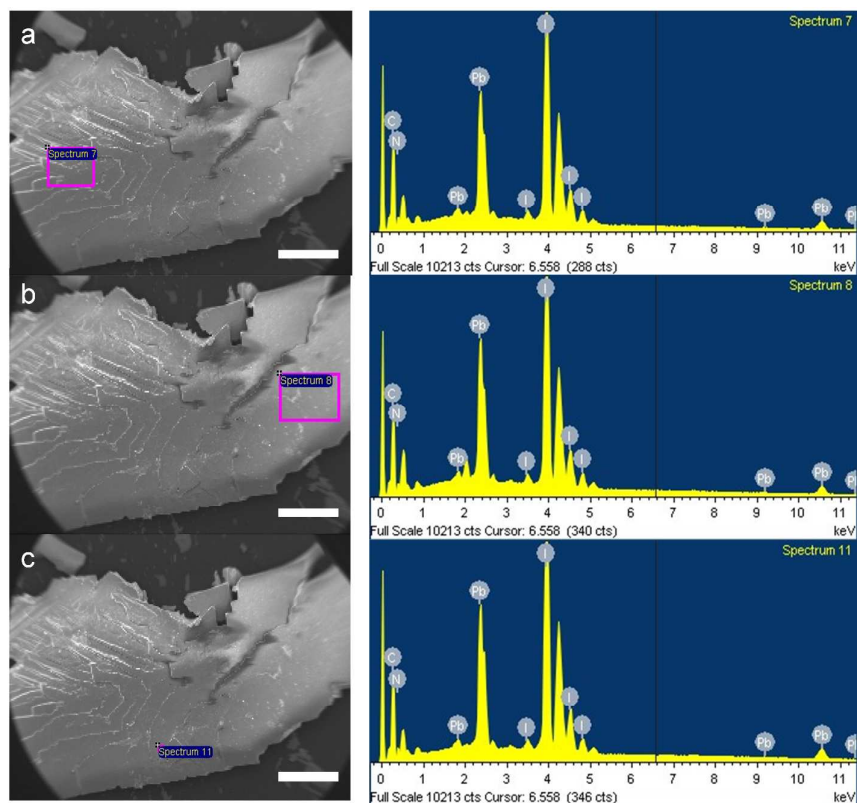

**Figure S4.** SEM-EDX images of lateral heterostructure for (a) N=1 portion (b) N=2 portion and (c) junction region. The scale bar is 2 mm. No Cl element was detected on the surface of the heterostructure even when MACl was used as precursor.

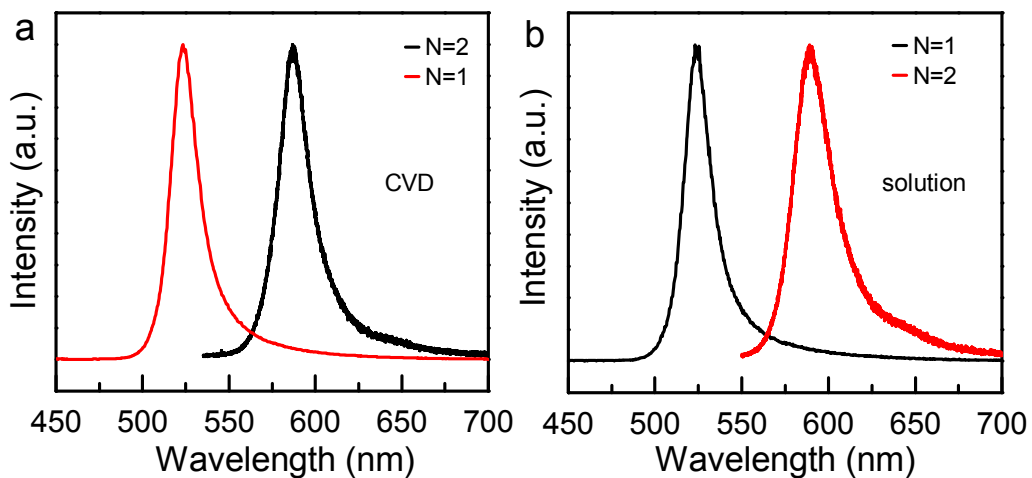

**Figure S5.** PL spectrum of N=1 and N=2 2D perovskite obtained by (a) gas-solid phase intercalation process and (b) solution method. The emission peaks of N=1 and N=2 portion of the lateral heterostructure coincide with those of N=1 and N=2 plates obtained by solution method, indicating that the low-temperature gas-solid intercalation preserves the crystal structures of N=1 and N=2 2D perovskites

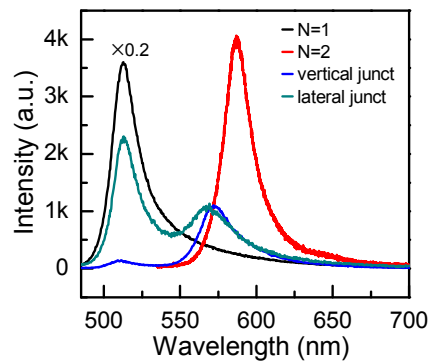

**Figure S6.** PL spectra show the intensity quenching for  $(\text{BA})_2\text{PbI}_4/(\text{BA})_2\text{MAPb}_2\text{I}_7$  lateral and vertical heterostructures. The emission intensity of the junction region for both lateral and vertical N=1/N=2 2D perovskite heterostructures significantly decreases compared with that of N=1 and N=2 regions. The charge transfer at the junction region might be a reason which has been found in other heterostructures<sup>3, 4, 5</sup>.

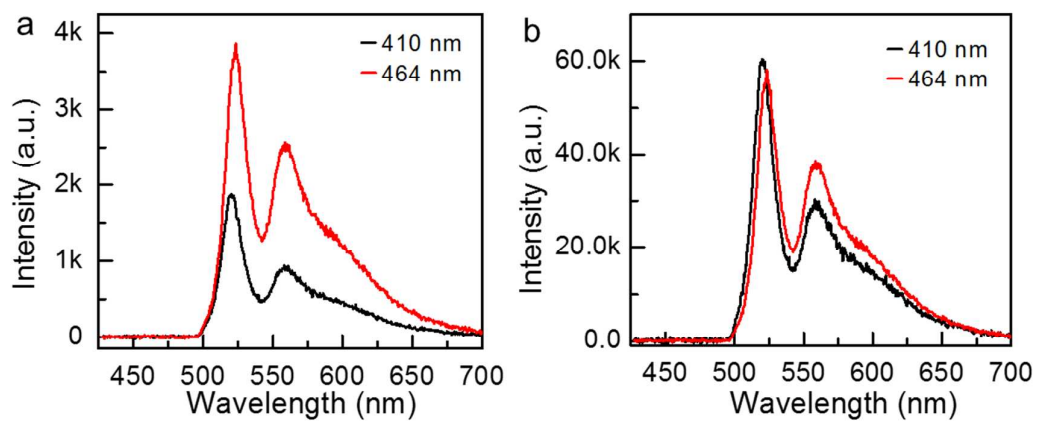

**Figure S7.** PL spectra excited at 410 nm and 460 nm for (a) vertical and (b) lateral heterostructures. For both lateral and vertical heterostructures, the excitation with higher energy leads to a blue-shift of the emission peak and relative stronger emission for N=1 compared with that of N=2.



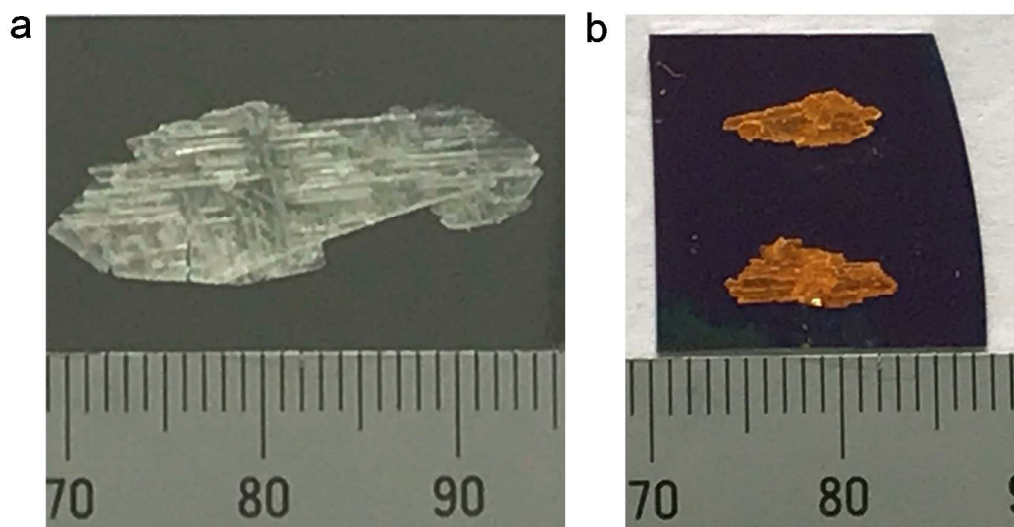

**Figure S8.** Picture of (a)  $(\text{BA})_2\text{PbBr}_4$  and (b)  $(\text{PEA})_2\text{PbBr}_4$  before intercalation. The synthesis of these two type 2D perovskites is similar to  $(\text{BA})_2\text{PbI}_4$  as shown in Supplementary Fig. 1. The centimeter size of the plates provides relatively easier procedure to obtain vertical and especially lateral heterostructures for which a piece of Si substrate was used as mask in our experiments

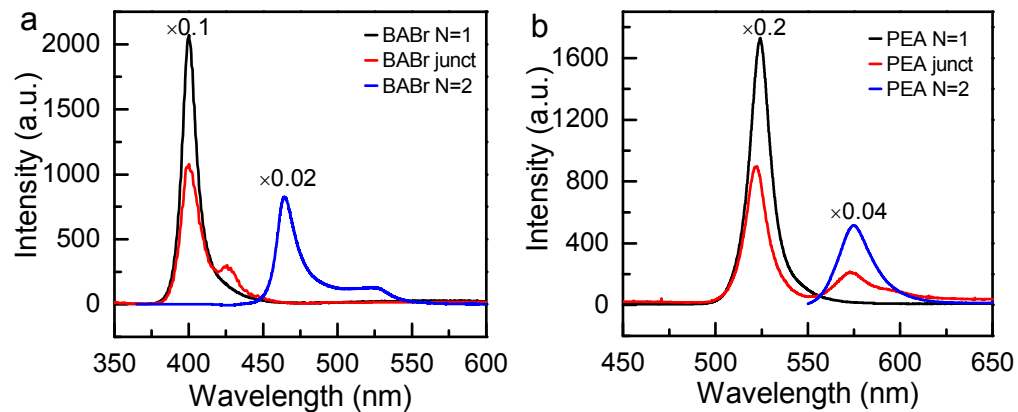

**Figure S9.** PL spectra show the intensity quenching for (a)  $(\text{BA})_2\text{PbBr}_4/(\text{BA})_2\text{MAPb}_2\text{Br}_7$  and (b)  $(\text{PEA})_2\text{PbI}_4/(\text{PEA})_2\text{MAPb}_2\text{I}_7$  lateral heterostructures compared with PL intensity acquired at N=1 and N=2 regions.

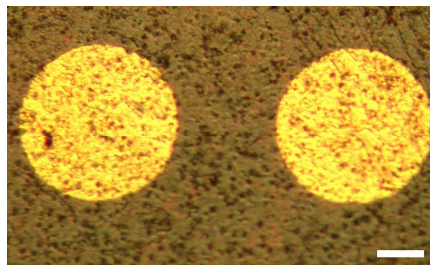

**Figure S10.** Optical image of a lateral heterojunction device. The scale bar is 50 μm. For lateral heterostructure device, two 5 nm Cr/50 nm Au electrodes were defined by shadow mask and e-beam evaporation, on a 300 nm SiO<sub>2</sub>/Si substrate with a channel length of around 100 μm.

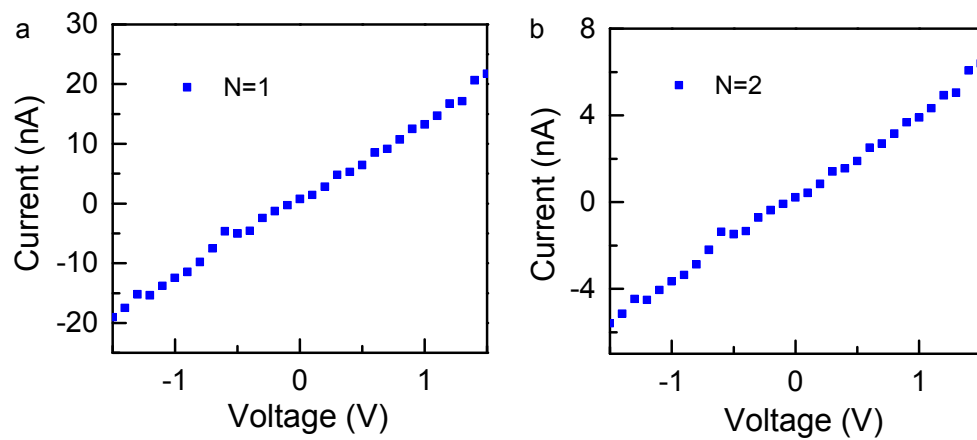

**Figure S11.** I-V curves for a)  $(\text{BA})_2\text{PbI}_4$  and b)  $(\text{BA})_2\text{MAPb}_2\text{I}_7$  2D perovskite plates with Cr/Au electrical contact.

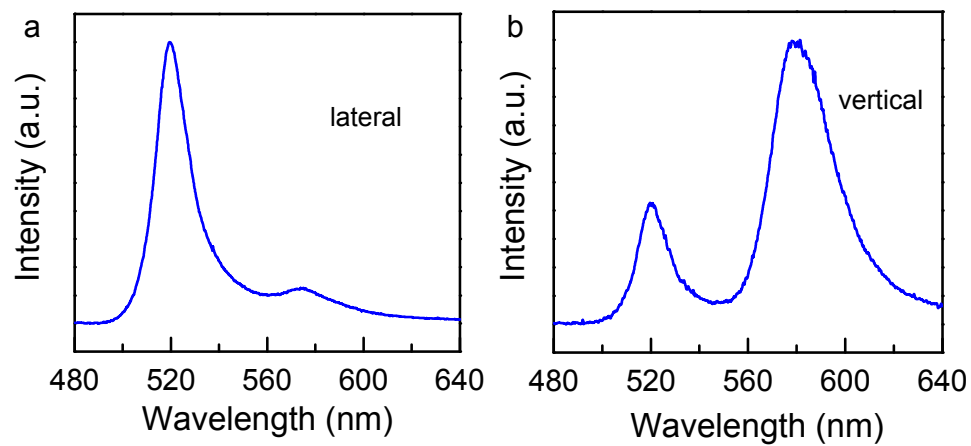

**Figure S12.** PL spectra from (a) lateral and (b) vertical devices.

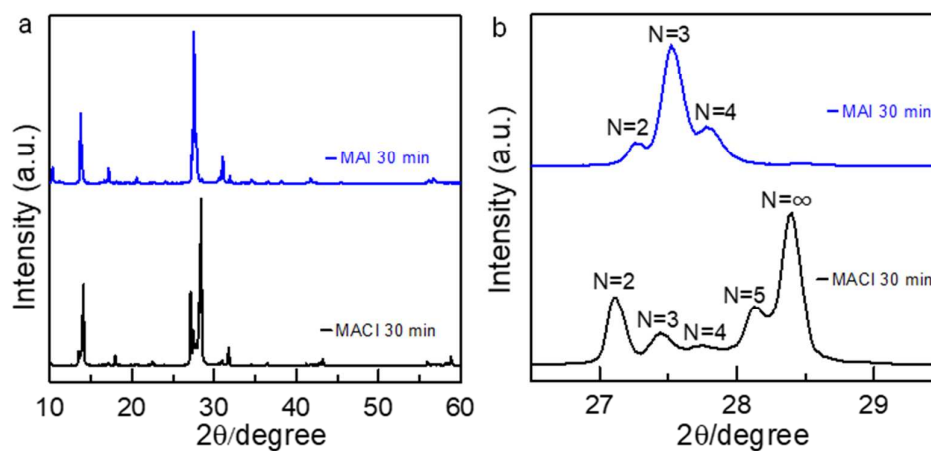

**Figure S13.** (a) XRD patterns of  $(\text{BA})_2(\text{MA})_{N-1}\text{PbNI}_{3N+1}$  for MAI and MACl used as precursor. (b) Close-up views of the characteristic regions between  $2\theta = 26.5\text{--}29.5^\circ$  show the different reaction ratios for MACl and MAI. The as-synthesized multi-heterostructure contains peaks from  $N=2$  to  $N=4$  and weak peak of  $N=\infty$  by using MAI as the precursor source while from  $N=2$  to  $N=\infty$  by using MACl as the precursor in (b)<sup>6,7</sup>.

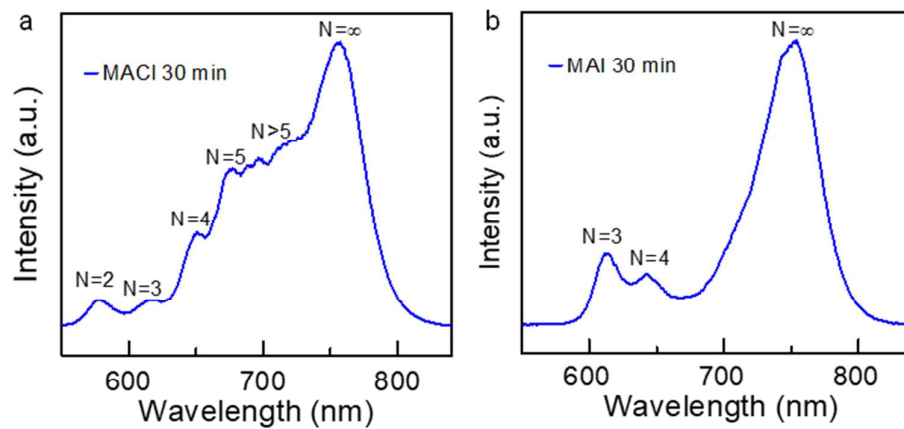

**Figure S14.** PL spectra from  $(\text{BA})_2(\text{MA})_{N-1}\text{PbN}_3\text{I}_{3N+1}$  multi-heterostructures obtained by using (a) MACl and (b) MAI as precursors reacting for 30 min.

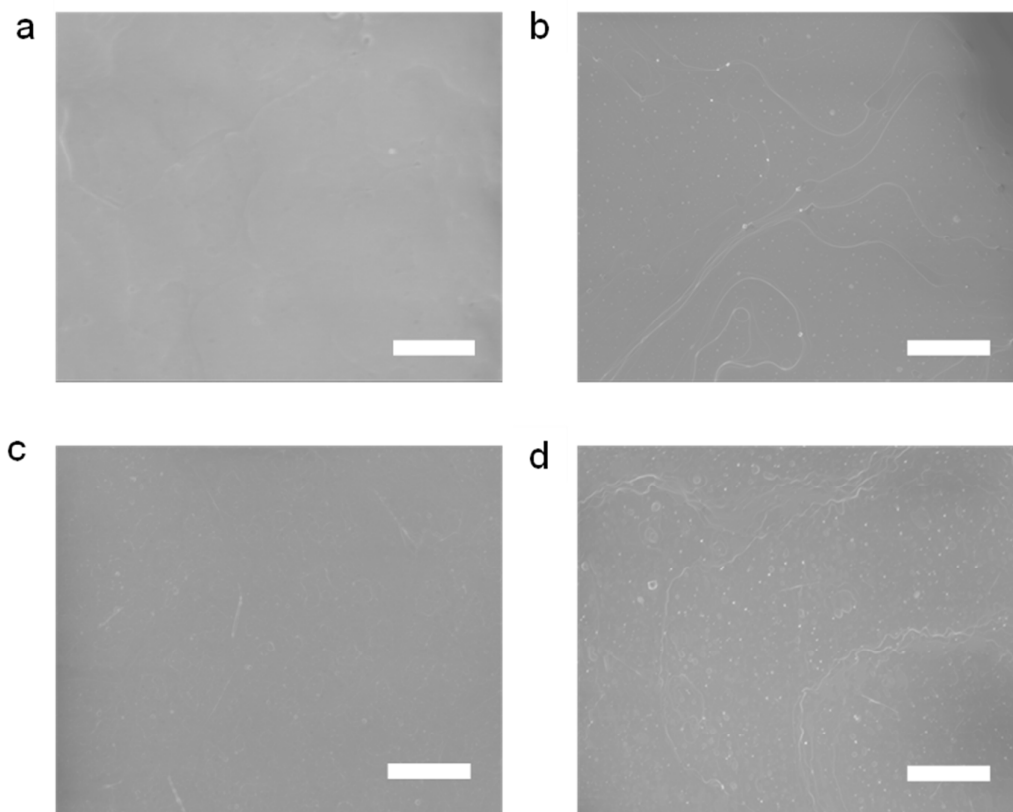

**Figure S15.** SEM image of lateral heterostructure after being stored in ambient conditions for a) pristine, b) 20 days, c) 40 days, d) 60 days. The scale bar is 20  $\mu\text{m}$ . The surface of the heterostructure looks relatively smooth after 60 days.



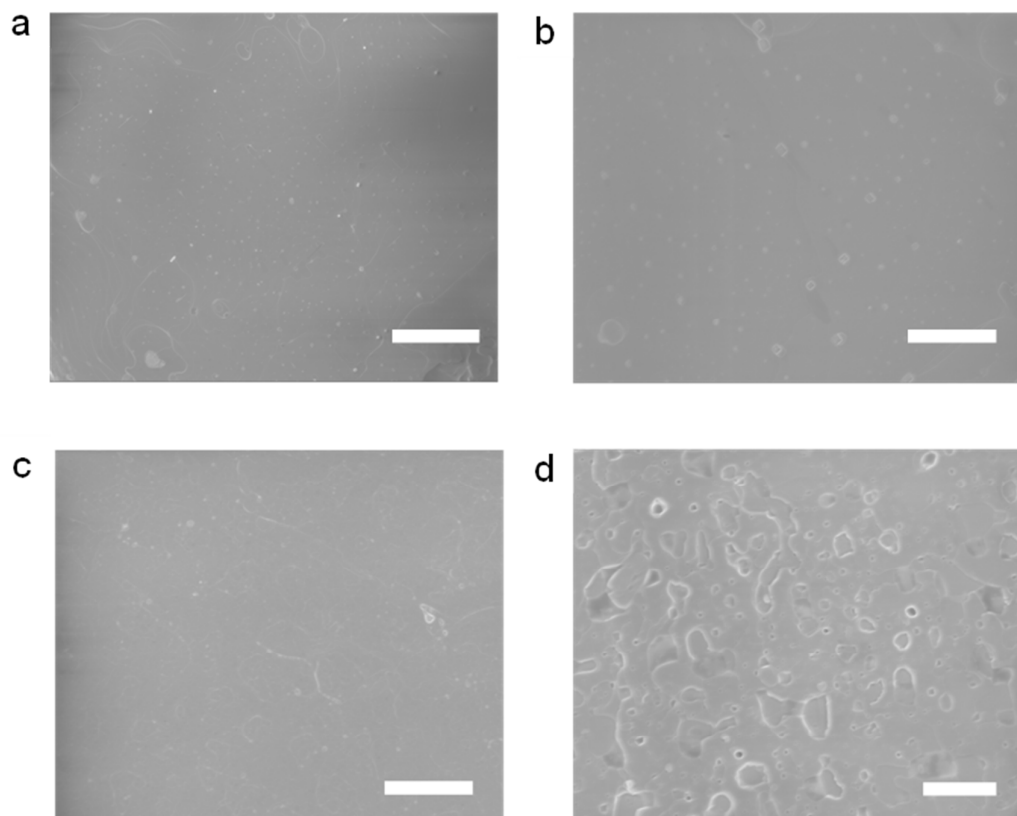

**Figure S16.** SEM image of vertical heterostructure after being stored in ambient conditions for a) pristine, b) 20 days, c) 40 days, d) 60 days. The scale bar is 20  $\mu\text{m}$ . The surface of the heterostructure looks relatively smooth after 60 days.

|         | N=2 solution |         | N=2 lateral |         | N=2 vertical |         |
|---------|--------------|---------|-------------|---------|--------------|---------|
| Element | Weight%      | Atomic% | Weight%     | Atomic% | Weight%      | Atomic% |
| C       | 17.67        | 64.41   | 17.83       | 64.37   | 17.89        | 64.25   |
| N       | 4.11         | 11.60   | 3.81        | 11.78   | 3.88         | 11.94   |
| I       | 54.66        | 17.03   | 56.23       | 19.22   | 55.12        | 18.41   |
| Pb      | 20.76        | 3.96    | 22.14       | 4.63    | 21.11        | 4.39    |

**Table S1.** Elements contained obtained by EDX for lateral heterostructure. The atomic ratio of the solution processed N=2 2D perovskite is consistent with that of N=2 portion in both lateral and vertical N=1/N=2 heterostructures produced by our gas-solid intercalation method, which further conforms the successful formation of N=1/N=2 heterostructures.

## References

- (1) Cao, D. H.; Stoumpos, C. C.; Farha, O. K.; Hupp, J. T.; Kanatzidis, M. G. 2D homologous perovskites as light-absorbing materials for solar cell applications. *J. Am. Chem. Soc.* **2015**, *137*, 7843-7850.
- (2) Blancon, J. C.; Tsai, H.; Nie, W.; Stoumpos, C. C.; Pedesseau, L.; Katan, C.; Kepenekian, M.; Soe, C. M. M.; Appavoo, K.; Sfeir, M. Y.; et al. Extremely efficient internal exciton dissociation through edge states in layered 2D perovskites. *Science* **2017**, *6331*, 1288.
- (3) Wu, K.; Chen, J.; McBride, J. R.; Lian, T. Efficient hot-electron transfer by a plasmon-induced interfacial charge-transfer transition. *Science* **2015**, *349*, 632-635.
- (4) Yuan, J.; Najmaei, S.; Zhang, Z.; Zhang, J.; Lei, S.; Ajayan, P. M.; Yakobson, B. I.; Lou, J. Photoluminescence quenching and charge transfer in artificial heterostacks of monolayer transition metal dichalcogenides and few-layer black phosphorus. *ACS Nano* **2015**, *9*, 555-563.
- (5) Wang, H.; Bang, J.; Sun, Y.; Liang, L.; West, D.; Meunier, V.; Zhang, S. B. The role of collective motion in the ultrafast charge transfer in van der Waals heterostructures. *Nat. Commun.* **2016**, *7*, 11504.
- (6) Stoumpos, C. C.; Cao, D. H.; Clark, D. J.; Young, J.; Rondinelli, J. M.; Jang, J. I.; Hupp, J. T.; Kanatzidis, M. G. Ruddlesden–Popper hybrid lead iodide perovskite 2D homologous semiconductors. *Chem. Mater.* **2016**, *28*, 2852-2867.
- (7) Stoumpos, C. C.; Soe, C. M. M.; Tsai, H.; Nie, W.; Blancon, J.; Cao, D. H.; Liu, F.; Traore, B.; Katan, C.; Even, J.; Mohite, A. D.; Kanatzidis, M. G. High members of the 2D Ruddlesden-Popper halide perovskites: synthesis, optical properties, and solar cells of  $(\text{CH}_3(\text{CH}_2)_3\text{NH}_3)_2(\text{CH}_3\text{NH}_3)_4\text{Pb}_5\text{I}_{16}$ . *Chem.* **2017**, *2*, 427-440.
